# Supplementary material for: The G8 screening tool enhances prognostic value to ECOG performance status in elderly cancer patients: A retrospective, single institutional study
Source: PubMed Central journal article supplement (PMC5480957; doi:10.1371/journal.pone.0179694), 2017-06-22
Supplement: pone.0179694.s002.pdf [file pone.0179694.s002.pdf]

# Supporting Figure 2

| Group               | No. of patients | Median OS, months (95% CI) |
|---------------------|-----------------|----------------------------|
| G8 score: 14.5–17.0 | 45              | 25.6 (16.4–NR)             |
| G8 score: 11.5–14   | 85              | 16.1 (11.7–18.8)           |
| G8 score: 8.5–11    | 79              | 9.6 (7.3–14.6)             |
| G8 score: 0–8       | 55              | 4.7 (3.4–8.5)              |

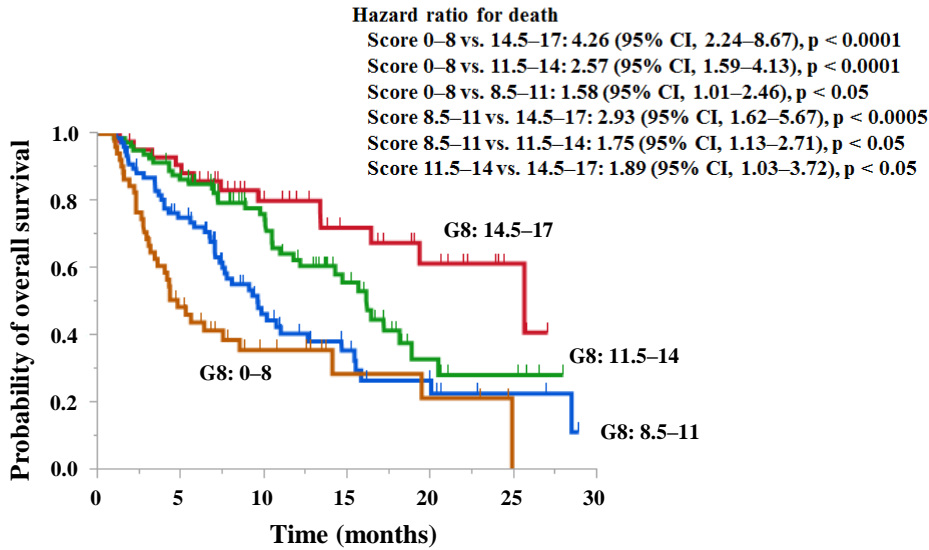

## Supporting Figure 2:

### Overall survival in elderly cancer patients in classification into four groups according to the G8 score.

Kaplan–Meier analyses for overall survival are shown. NR, not reached.
