# Supplementary material for: The G8 screening tool enhances prognostic value to ECOG performance status in elderly cancer patients: A retrospective, single institutional study
Source: PubMed Central journal article supplement (PMC5480957; doi:10.1371/journal.pone.0179694), 2017-06-22
Supplement: pone.0179694.s004.pdf [file pone.0179694.s004.pdf]

# Supporting Figure 4

a

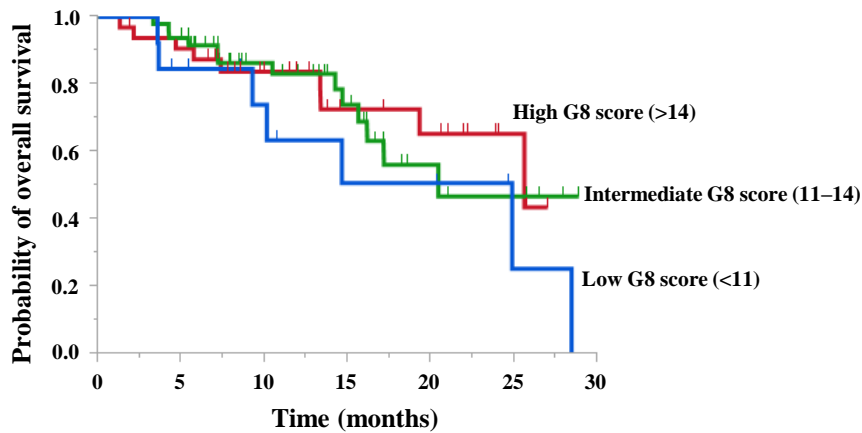

b

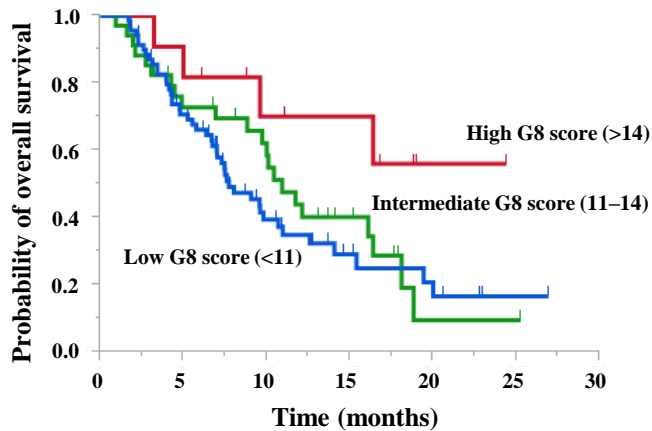

## Supporting Figure 4:

### Overall survival according to the G8 score in each group, an ECOG-PS of 0 or 1.

Kaplan-Meier analyses for overall survival in patients with an ECOG-PS of 0 and with an ECOG-PS of 1 are shown in (a) or (b), respectively. Patients were classified into three groups, the high score, the intermediate score, or the low score, according to their G8 score. ECOG-PS, Eastern Cooperative Oncology Group performance status.
